# Supplementary material for: Pyruvate Abundance Confounds Aminoglycoside Killing of Multidrug-Resistant Bacteria via Glutathione Metabolism
Source: PubMed Central journal article supplement (PMC11654824; doi:10.34133/research.0554), 2024-12-18
Supplement: research.0554.f1.pdf [file research.0554.f1.pdf]

# Supplementary Materials for

## **Pyruvate Abundance Confound Aminoglycoside Killing of Multidrug-resistant Bacteria via Glutathione Metabolism**

Jiao Xiang<sup>1,2</sup>, Si-qi Tian<sup>1,2</sup>, Shi-wen Wang<sup>1</sup>, Ying-li Liu<sup>1,2</sup>, Hui Li<sup>1,2</sup>, Bo Peng<sup>1,2, \*</sup>

\*Corresponding author. Email: [pengb26@mail.sysu.edu.cn](mailto:pengb26@mail.sysu.edu.cn)

### **This PDF file includes:**

Figures S1 to S8

Tables S1 to S3

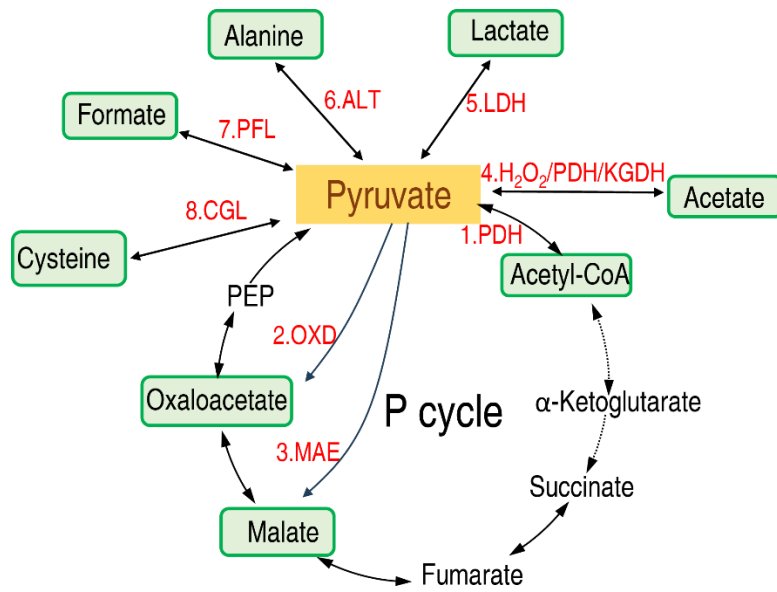

**figure S1 Pyruvate has seven metabolic fates**

| Antibiotics        | µg/mL |
|--------------------|-------|
| Sulfamethazine     | 125   |
| Sulfamethoxazole   | 125   |
| Roxithromycin      | 50    |
| Colistin           | 125   |
| Sulfamonomethoxine | 7.81  |
| Sulfadiazine       | 7.81  |
| Tetracycline       | 50    |
| Doxycycline        | 31.25 |
| Thiamphenicol      | 62.5  |
| Neomycin           | 7.81  |
| Flufenicol         | <1.95 |
| Fluoroquine        | <1.95 |
| Gentamicin         | 6.25  |

**Fig. S2 MIC of PPD200/87**

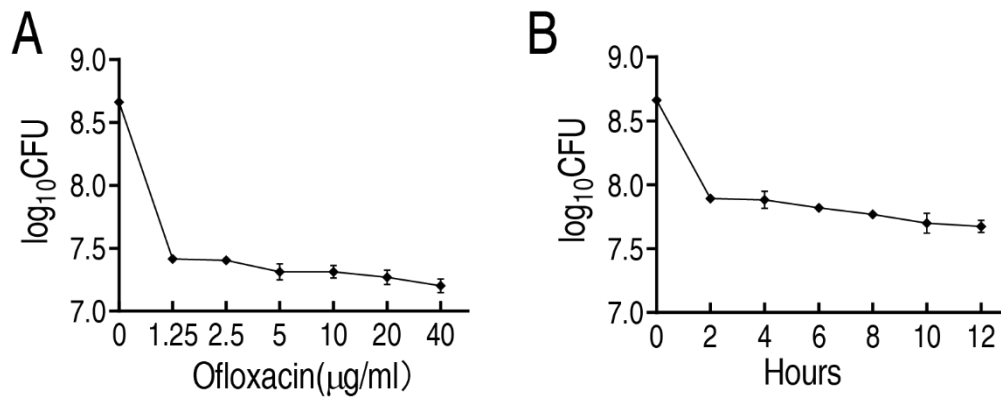

**Fig. S3 Preparing of PDD200/87 pesisters.** (A) Survival of PDD200/87 in the indicated concentration of ofloxacin. (B) Survival of PDD200/87 in the indicated incubation time.

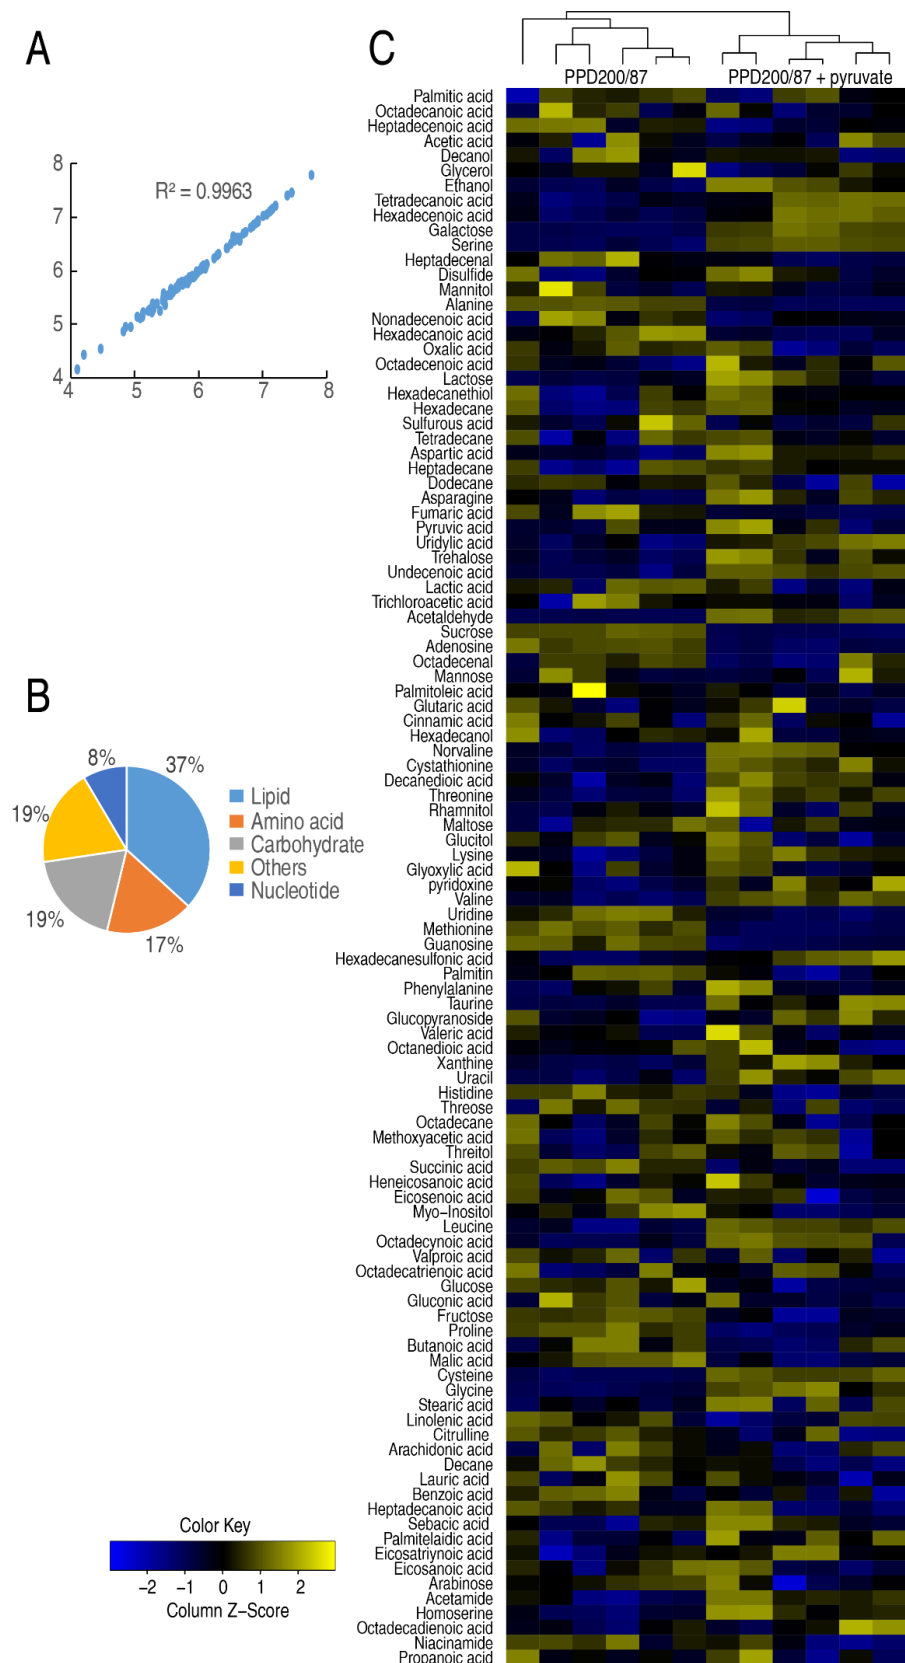

**Fig. S4 Metabolic profile of PPD200/87 in medium with and without pyruvate.**

(A) Abundance correlation of metabolites quantified in two technical replicates with high reproducibility. Metabolite abundance was represented in  $\log_{10}$ .

(B) Category of metabolites detected.

(C) Heatmaps of unsupervised hierarchical clustering showing differential abundance of metabolites of PPD200/87 in medium with and without pyruvate.

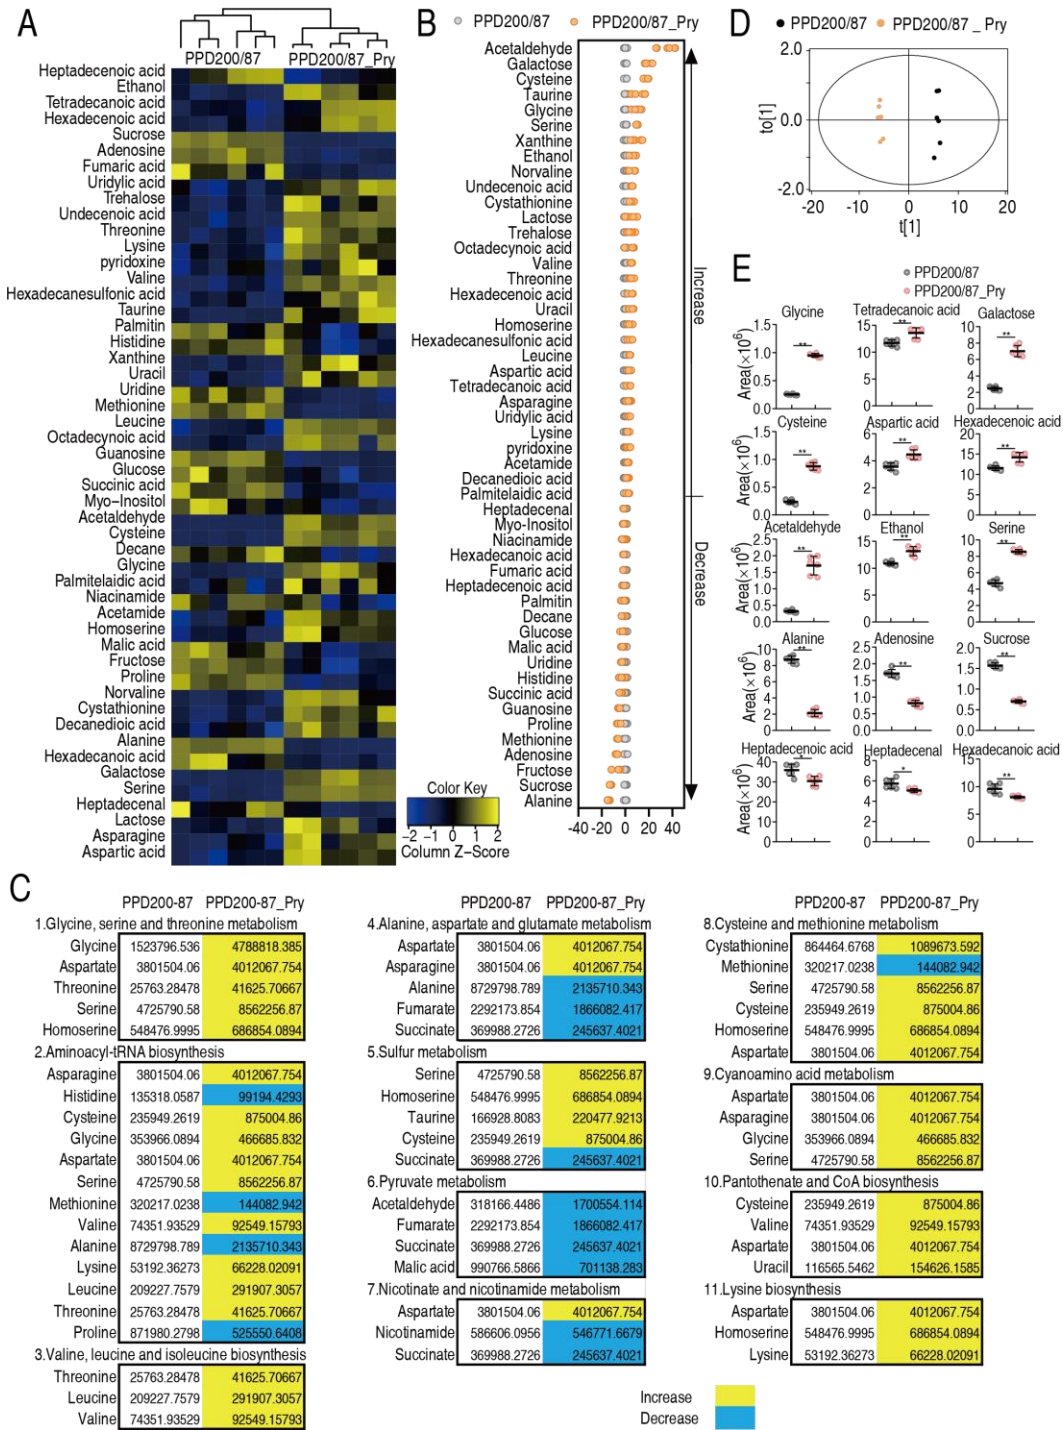

**fig. S5 Differential metabolome and biomarkers**

(A) Heat map showing differentially abundant metabolites between PPD200/87 and PPD200/87+pyruvate. Yellow and blue colors indicate increase and decrease of the metabolites scaled to mean and standard deviation of row metabolite level, respectively (see color scale).

(B) Z-score plot of differentially abundant metabolites. The data were separately scaled to the mean and SD of the controls. Each point represents one metabolite in one technical repeat and colored by sample types.

(C) Integrative analysis of metabolites in enriched metabolic pathways.

**(D)** OPLS-DA analysis.

**(E)** Abundance of biomarkers.



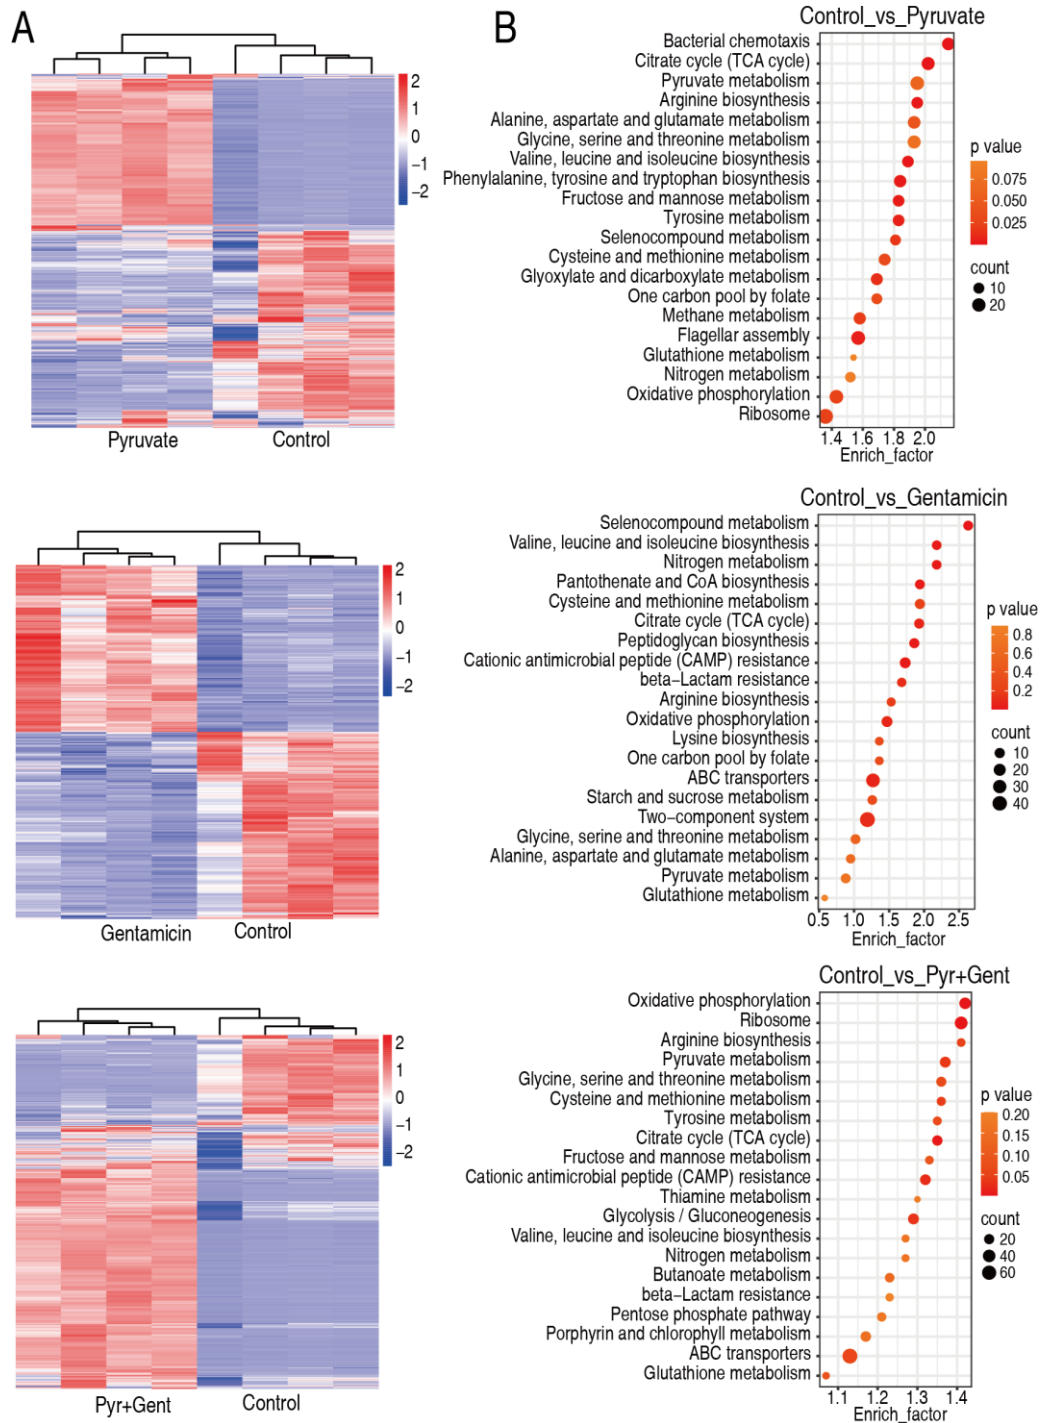

**Fig. S6 Transcriptome analysis for DEGs and pathway enrichment.**

(A) Heat map showing DEGs between PPD200/87, PPD200/87+pyruvate, PPD200/87+gentamicin, PPD200/87+pyruvate+gentamicin. Red and purple colors indicate increase and decrease of the metabolites scaled to mean and standard deviation of row metabolite level, respectively (see color scale).

(B) Pathway enrichment.

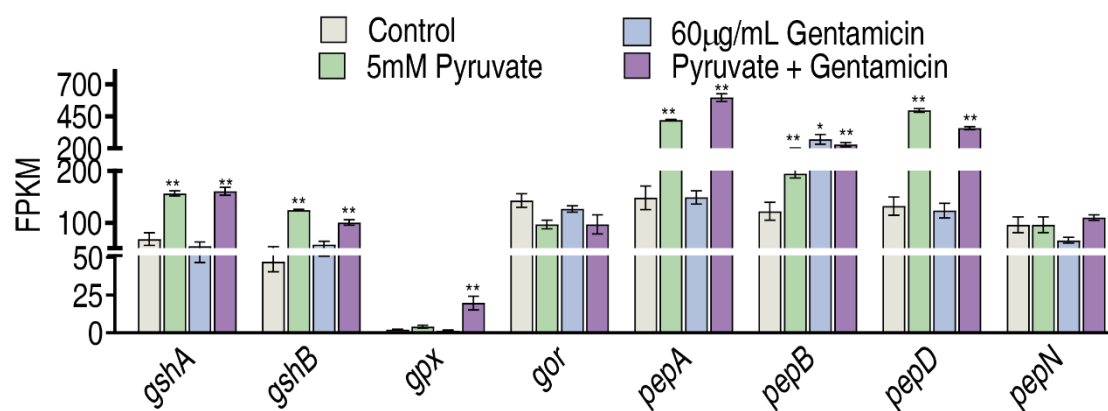

**fig. S7 Transcriptome analysis for these indicated genes**

|           | Ampicillin | Cefoperazone | Ceftazidime | MeropeneM | Gentamicin | Tobramycin | Kanamycin | Levofloxacin | Ofloxacin | Ciprofloxacin |
|-----------|------------|--------------|-------------|-----------|------------|------------|-----------|--------------|-----------|---------------|
| S-KPN100  | 128        | 0.0625       | 0.25        | 0.031     | 4          | 2          | 2         | 0.0625       | 0.0625    | 0.031         |
| S-KPN101  | 128        | 0.0625       | 1           | 0.031     | 2          | 2          | 2         | 0.0625       | 0.0625    | 0.031         |
| S-KPN102  | 128        | 0.0625       | 0.25        | 0.031     | 2          | 2          | 4         | 0.0625       | 0.0625    | 0.031         |
| S-KPN104  | 128        | 0.0625       | 0.125       | 0.031     | 2          | 2          | 2         | 0.0625       | 0.0031    | 0.031         |
| S-KPN106  | 128        | 0.25         | 0.5         | 0.031     | 2          | 2          | 2         | 0.0625       | 0.0625    | 0.031         |
| S-KPN107  | 128        | 0.25         | 0.0625      | 0.031     | 2          | 2          | 2         | 0.0625       | 0.0625    | 0.031         |
| MDR-KPN68 | ≥256       | ≥256         | 32          | 0.0625    | 8          | 16         | 8         | 2            | 8         | 8             |
| MDR-KPN72 | ≥256       | ≥256         | 2           | 0.0625    | 8          | 16         | 4         | 8            | 0.25      | 2             |
| MDR-KPN76 | ≥256       | ≥256         | 64          | 0.0156    | 64         | 32         | 16        | 16           | 8         | 8             |
| MDR-KPN77 | ≥256       | ≥256         | 128         | 0.0625    | 64         | 32         | 8         | 16           | 8         | 8             |
| MDR-KPN78 | ≥256       | ≥256         | 0.25        | 0.0156    | 32         | 4          | 16        | 16           | 16        | 16            |
| MDR-KPN81 | ≥256       | ≥256         | 1           | 0.0625    | 32         | 2          | 16        | 32           | 4         | 32            |
| S-PAE643  | 32         | 4            | 2           | 1         | 0.25       | 1          | 2         | 0.25         | 1         | 0.25          |
| S-PAE644  | 32         | 8            | 2           | 1         | 0.125      | 0.5        | 1         | 0.25         | 2         | 0.25          |
| S-PAE645  | 32         | 2            | 2           | 0.25      | 0.5        | 1          | 0.5       | 1            | 1         | 0.125         |
| S-PAE646  | 64         | 2            | 2           | 0.5       | 1          | 1          | 0.25      | 0.5          | 2         | 0.0625        |
| S-PAE647  | 16         | 4            | 2           | 0.25      | 0.25       | 0.25       | 0.5       | 0.5          | 1         | 0.25          |
| S-PAE648  | 16         | 2            | 2           | 0.25      | 0.25       | 0.25       | 0.5       | 0.25         | 2         | 0.125         |
| MDR-PAE16 | ≥256       | ≥256         | 8           | 1         | 16         | 4          | 64        | 16           | 8         | 1             |
| MDR-PAE12 | ≥256       | ≥256         | 2           | 2         | 16         | 8          | 64        | 8            | 8         | 0.5           |
| MDR-PAE11 | ≥256       | ≥256         | 2           | 4         | 64         | 6          | 64        | 8            | 4         | 0.25          |
| MDR-PAE14 | ≥256       | ≥256         | 4           | 2         | 32         | 2          | 64        | 16           | 2         | 2             |
| MDR-PAE3  | ≥256       | ≥256         | 2           | 0.5       | 16         | 2          | 128       | 8            | 1         | 0.125         |
| CR-PAE17  | ≥256       | ≥256         | 2           | 8         | 16         | 32         | 128       | 8            | 4         | 2             |
| MSSA1     | 4          | 4            | 4           | 0.25      | 2          | 2          | 2         | 0.5          | 1         | 0.125         |
| MSSA2     | 2          | 2            | 2           | 0.5       | 2          | 2          | 4         | 1            | 1         | 0.031         |
| MSSA3     | 4          | 1            | 4           | 1         | 1          | 0.5        | 0.25      | 2            | 2         | 0.031         |
| MSSA4     | 8          | 2            | 1           | 0.25      | 0.25       | 0.5        | 0.5       | 0.25         | 1         | 0.031         |
| MSSA5     | 4          | 1            | 4           | 0.5       | 0.5        | 1          | 5         | 0.5          | 0.25      | 0.0625        |
| MSSA6     | 8          | 0.5          | 2           | 1         | 2          | 2          | 1         | 1            | 0.5       | 0.125         |
| MRSA11    | ≥256       | ≥256         | 64          | 2         | 32         | 16         | 16        | 16           | 8         | 2             |
| MRSA12    | ≥256       | 64           | 32          | 4         | 32         | 16         | 32        | 8            | 16        | 2             |
| MRSA13    | ≥256       | 64           | 64          | 2         | 16         | 8          | 16        | 16           | 32        | 0.125         |
| MRSA14    | ≥256       | 32           | 64          | 2         | 32         | 16         | 16        | 16           | 16        | 2             |
| MRSA16    | ≥256       | ≥256         | 128         | 16        | 16         | 4          | 16        | 16           | 32        | 0.25          |
| MRSA18    | 128        | 16           | 64          | 2         | 16         | 2          | 16        | 4            | 8         | 0.125         |
| S-ECO61   | 2          | 1            | 2           | 0.0625    | 0.5        | 0.5        | 0.25      | 0.25         | 0.5       | 0.25          |
| S-ECO62   | 1          | 0.25         | 0.5         | 0.0625    | 2          | 0.25       | 0.125     | 0.25         | 0.5       | 0.125         |
| S-ECO63   | 0.25       | 0.25         | 1           | 0.031     | 0.5        | 0.125      | 0.5       | 0.5          | 0.125     | 0.0625        |
| S-ECO64   | 1          | 0.125        | 0.5         | 0.031     | 0.5        | 0.25       | 1         | 1            | 0.25      | 0.25          |
| S-ECO65   | 0.5        | 1            | 0.125       | 0.0156    | 0.5        | 0.5        | 1         | 0.25         | 1         | 0.125         |
| S-ECO66   | 0.5        | 0.5          | 0.5         | 0.0625    | 2          | 1          | 0.5       | 0.125        | 0.25      | 0.125         |
| MDR-ECO41 | ≥256       | ≥256         | 16          | 0.5       | 8          | 16         | 32        | 16           | 1         | 0.25          |
| MDR-ECO44 | ≥256       | ≥256         | 4           | 0.5       | 8          | 16         | 2         | 8            | 0.5       | 0.125         |
| MDR-ECO45 | ≥256       | ≥256         | 16          | 1         | 16         | 8          | 32        | 8            | 2         | 0.25          |
| MDR-ECO46 | ≥256       | ≥256         | 8           | 0.5       | 8          | 16         | 16        | 32           | 2         | 0.5           |
| MDR-ECO47 | ≥256       | ≥256         | 16          | 2         | 16         | 16         | 8         | 16           | 0.5       | 1             |
| MDR-ECO48 | ≥256       | ≥256         | 16          | 1         | 16         | 8          | 2         | 8            | 1         | 0.5           |

**Fig. S8 MIC of clinically isolated multidrug-resistant (MDR) and carbapenem-resistant pathogens.**

**Table S1 Primers for qRT-PCR**

| Gene                 |         | Sequence (5'-3')          | Gene        |         | Sequence (5'-3')      |
|----------------------|---------|---------------------------|-------------|---------|-----------------------|
| <i>ETA_E_16S</i>     | Forward | ACTGAGACACGGTCCAGACTCCTAC | <i>sucA</i> | Forward | GCGTTTCATCATCTGACGCC  |
|                      | Reverse | TTAACGTTACACCTTCCTCCCTAC  |             | Reverse | TTCTCGTCGGTGTGGTCAG   |
| <i>aspC</i>          | Forward | GTATCTGGGTGAGCAACCCC      | <i>sucB</i> | Forward | CCTGATGTCCACGCCGATTA  |
|                      | Reverse | TTATGGCAACAGCCGTGGAA      |             | Reverse | ATGGTCATACGAAAGCGCCA  |
| <i>thrA</i>          | Forward | AGCGGTATTTCCGTGGTGTT      | <i>sucD</i> | Forward | TATGAGCGCGTGAAGCAGAC  |
|                      | Reverse | TCGATAACATCCAGCGGCTC      |             | Reverse | TCACCGATCATCAGATGGC   |
| <i>ETA_E_3344</i>    | Forward | TGTCAGGGCGGGCATTATAC      | <i>sucC</i> | Forward | GCAATATCGGCTGCATGGTG  |
|                      | Reverse | GGTTTTCACTCCGCTCTCCA      |             | Reverse | CCGCCGAAAATGTTGACCAG  |
| <i>metA</i>          | Forward | GGCTTTGACGACGGCTTTTT      | <i>sdhB</i> | Forward | GTTACAACCCGACGTGGAT   |
|                      | Reverse | CATACTCCGGATGGCCTGTC      |             | Reverse | CCGTTTTGGCCGTTTCATGTT |
| <i>ETA_E_3340</i>    | Forward | TGCTGCACCTCTGTACCAAG      | <i>sdhA</i> | Forward | AGTCAGAGAGTTTGACGCCG  |
|                      | Reverse | CGCCGGTCACACCGATATTA      |             | Reverse | GAAACGGTATGGAAACGGGT  |
| <i>metB</i>          | Forward | TGATATCGTCGTGCACTCGG      | <i>fumC</i> | Forward | AATGTCTTTCGTCCGCTGGT  |
|                      | Reverse | TTGTGCAGATAGCCAGACG       |             | Reverse | GCAGCAGTTCATCGATACGC  |
| <i>ETA_E_2812</i>    | Forward | CACCACCACCCATAAGACCC      | <i>mdH</i>  | Forward | CGGCATCATCCGTAACCTGA  |
|                      | Reverse | CTGCTGCTGGTAACGGGTAA      |             | Reverse | GAAGGTGTTGGAGCGGATGA  |
| <i>uptG</i>          | Forward | CGGACAAGATGAGCGGAGAG      | <i>pckA</i> | Forward | AAGGCTTAACCCGACGTGAT  |
|                      | Reverse | GGTCGATATACAGGCTGCC       |             | Reverse | GTAACGGTACCAGCGCTCATA |
| <i>ETA_E_1960</i>    | Forward | ATCCTTCGCTACATCCGCAG      | <i>MaeB</i> | Forward | CCGGAGTTGGAGATCGATGG  |
|                      | Reverse | GCAGCCATACGCTGAACTTG      |             | Reverse | AATATTGGCGGCCCTTTCA   |
| <i>DCL27_RS10995</i> | Forward | AGAGCCGCCTCGTACAAAAA      | <i>gshA</i> | Forward | TTTCTGATCTGGTGCGTGCT  |
|                      | Reverse | GCATTTCCGGAATGATCGCT      |             | Reverse | CATGACAGCCAATGCCGATG  |
| <i>cysK</i>          | Forward | CGGACCGCACAAAATCCAAG      | <i>gshB</i> | Forward | CAGGATGACCCCAACCTGTC  |
|                      | Reverse | CGAGGATACCCTTTCACGC       |             | Reverse | GTTTCGCCGCTTTTGGGAAT  |
| <i>aceE</i>          | Forward | GAAACTGTTTGCCGAGCAGG      | <i>gpx</i>  | Forward | ACCTTTCATACCCGCCAAGG  |
|                      | Reverse | GTGGTGACGCAGTTTTTAC       |             | Reverse | GGCAAGTGGCTAGAAGAGCA  |
| <i>aceF</i>          | Forward | CCGGAGACAAGGTGAAGACC      | <i>gor</i>  | Forward | CCGGGCGCAGAATATGGTAT  |
|                      | Reverse | CAACCTCATCACCGCCGATA      |             | Reverse | ACGGACAACAGGTGGGTTT   |
| <i>gltA</i>          | Forward | GCGCGCCAAGGATAAGAATG      | <i>pepA</i> | Forward | ATGCCGCCCAACATCTGTAA  |
|                      | Reverse | GCTACCTCCAGCAGATCGTC      |             | Reverse | ATCACCGACATCAGCGACTC  |
| <i>acnB</i>          | Forward | GGGATATACCCTGGCGCAAA      | <i>pepB</i> | Forward | AGGGGATGAAGCAGGTTTCG  |
|                      | Reverse | GCAGGCCAGATCCTTCAACT      |             | Reverse | TATTCAGCAGCCGACGATCC  |
| <i>icd</i>           | Forward | TGATCAAGGTGGTGGATGCC      | <i>pepD</i> | Forward | TGTGGCAGATCTTTGCCGAT  |
|                      | Reverse | ATAGACCTGGGTCGCCTTCT      |             | Reverse | CACCACCGGAATGCGTTTTT  |
|                      |         |                           | <i>pepN</i> | Forward | GATTCATCCGGCGCAAAACA  |
|                      |         |                           |             | Reverse | TTTATCCGCCACGATACGGG  |

**Table S2 Primers for construction of gene-deleted mutants**

| <b>Primer</b>        | <b>Sequence (5'-3')</b>                      |
|----------------------|----------------------------------------------|
| <i>pepB</i> -For     | ggtaaaaaggatcgatcctGAAGGCTTTGACTCCCTTGGGG    |
| <i>pepB</i> -int-Rev | CCTGCTTCATCCCCTGGGTATCCA                     |
| <i>pepB</i> -int-For | TACCCAGGGGATGAAGCAGGTCCTGTGCACTTCGTCACTGACTA |
| <i>pepB</i> -Rev     | tcgatatcgatcggtaccTTTAAAAACAGCGTCTCGCCGC     |
| <i>gor</i> -For      | gggtaaaaaggatcgatcctACCTATGCACTGTGGTACCCGG   |
| <i>gor</i> -int-Rev  | CGATTGATGGAGGCGATAACCGCC                     |
| <i>gor</i> -int-For  | GGTATCGCCTCCATCAATCGGATCCACGGGATCGGCTTCGG    |
| <i>gor</i> -Rev      | tcgatatcgatcggtaccTACGTAGCCTGGCTCAGCGTAG     |
| <i>metB</i> -For     | GGTAAAAAGGATCGATCCTCTAACCCGGCCAACCCCGC       |
| <i>metB</i> -int-Rev | GGGGTTGCCGCTACGGGCGTATTC                     |
| <i>metB</i> -int-For | CCCGTAGCGGCAACCCCTGCGTGCTGCGCGGCGATG         |
| <i>metB</i> -Rev     | TCGATATCGCATGCGGTACCAGAAGCGCACCATCTGAT       |
| <i>aspC</i> -For     | GGTAAAAAGGATCGATCCTAAGTACGACGCCAACAACGT      |
| <i>aspC</i> -int-Rev | TTAACGCTGGTCAGCACCG                          |
| <i>aspC</i> -int-For | TGCTGACCAGCGTTAAAGGCGTCTACGCCGTCAGCT         |
| <i>aspC</i> -Rev     | TCGATATCGCATGCGGTACCGGTGCTCGGGGAGAGCGTGA     |
| <i>gpx</i> -For      | GGTAAAAAGGATCGATCCTGGGGAATGCCTGGTGCAGCA      |
| <i>gpx</i> -int-Rev  | ACTCGCGGAACAGCGCGTGCCTGGTG                   |
| <i>gpx</i> -int-For  | CGACGCGCTGTTCCGCGAGTATGAAGAGATCATCCTGGGTA    |
| <i>gpx</i> -Rev      | TCGATATCGCATGCGGTACCATGCGTTTGGCATGGATACG     |

**Table S3 Primer for gene clone**

| <b>Primer</b>   | <b>Sequence (5'-3')</b>                       |
|-----------------|-----------------------------------------------|
| <i>gor</i> -For | gctgatcggatccgaattcatgactaaacattatgactatctcgc |
| <i>gor</i> -Rev | TTAGATCCTCCTCCTGCGGCCGCttaacgcatggtgacaaactcc |
